# Supplementary material for: HPV-transformed cells exhibit altered HMGB1-TLR4/MyD88-SARM1 signaling axis
Source: PubMed Central journal article supplement (PMC5823898; doi:10.1038/s41598-018-21416-8), 2018-02-22
Supplement: 41598_2018_21416_MOESM3_ESM.pdf [file 41598_2018_21416_MOESM3_ESM.pdf]

**HPV-transformed cells exhibit altered HMGB1-TLR4/MyD88-SARM1 signaling axis**

Mirian Gallote Morale, Walason da Silva Abjaude, Aline Montenegro Silva, Luisa Lina Villa, Enrique Boccardo

PCR Array Catalog #: PAHS-018Z

| Position | Unigene   | Refseq       | Symbol   | Description                                              | Gname                  | RT2 Catalog |
|----------|-----------|--------------|----------|----------------------------------------------------------|------------------------|-------------|
| A01      | Hs.159494 | NM_000061    | BTk      | Brunton agammaglobulinemia tyrosine kinase               | AGMX1/AT/ATK/BPK/IN    | PPH00086A   |
| A02      | Hs.599762 | NM_001228    | CASP8    | Caspase 8, apoptosis-related cysteine peptidase          | ALPS2B/CAP4/Casp-8/H   | PPH00359F   |
| A03      | Hs.303649 | NM_002982    | CCL2     | Chemokine (C-C motif) ligand 2                           | GDCF-2/HC11/HSMCR3     | PPH00192F   |
| A04      | Hs.163867 | NM_000591    | CD14     | CD14 molecule                                            | -                      | PPH05723A   |
| A05      | Hs.87205  | NM_005582    | CD180    | CD180 molecule                                           | LY64/Ly78/MGC12623     | PPH06054A   |
| A06      | Hs.838    | NM_005191    | CD80     | CD80 molecule                                            | B7/B7-1/B7.1/BB1/CD2   | PPH00860F   |
| A07      | Hs.171182 | NM_006889    | CD86     | CD86 molecule                                            | B7-2/B7.2/B70/CD28LG   | PPH00826A   |
| A08      | Hs.198998 | NM_001278    | CHUK     | Conserved helix-loop-helix ubiquitous kinase             | IKBKA/IKK-alpha/IKK1/I | PPH00649C   |
| A09      | Hs.236516 | NM_014358    | CLEC4E   | C-type lectin domain family 4, member E                  | CLECSF9/MINCLE         | PPH06040A   |
| A10      | Hs.1349   | NM_000758    | CSF2     | Colony stimulating factor 2 (granulocyte-macrophage)     | GMCSF/MGC131935/M      | PPH00576C   |
| A11      | Hs.2233   | NM_000759    | CSF3     | Colony stimulating factor 3 (granulocyte)                | C17orf33/CSF3OS/GCSF   | PPH00723B   |
| A12      | Hs.632586 | NM_001565    | CXCL10   | Chemokine (C-X-C motif) ligand 10                        | C7/IFI10/INP10/IP-10/S | PPH00765E   |
| B01      | Hs.515146 | NM_016581    | ECSIT    | ECSIT homolog (Drosophila)                               | SITPEC                 | PPH06039A   |
| B02      | Hs.131431 | NM_002759    | EIF2AK2  | Eukaryotic translation initiation factor 2-alpha kinase  | EIF2AK1/MGC126524/H    | PPH01327B   |
| B03      | Hs.181128 | NM_005229    | ELK1     | ELK1, member of ETS oncogene family                      | -                      | PPH00140C   |
| B04      | Hs.86131  | NM_003824    | FADD     | Fas (TNFRSF6)-associated via death domain                | MGC8528/MORT1          | PPH00367A   |
| B05      | Hs.728789 | NM_005252    | FOS      | FBJ murine osteosarcoma viral oncogene homolog           | AP-1/C-FOS             | PPH00094A   |
| B06      | Hs.593339 | NM_002128    | HMGB1    | High mobility group box 1                                | DKFZp686A04236/HMG     | PPH00999F   |
| B07      | Hs.37003  | NM_005343    | HRAS     | V-Ha-ras Harvey rat sarcoma viral oncogene homolog       | C-BAS/HAS/C-H-RAS/C-   | PPH00159C   |
| B08      | Hs.728810 | NM_005345    | HSPA1A   | Heat shock 70kDa protein 1A                              | FLJ54303/FLJ54370/FLJ  | PPH01193B   |
| B09      | Hs.595053 | NM_002156    | HSPD1    | Heat shock 60kDa protein 1 (chaperonin)                  | CPN60/GROEL/HLA4/H     | PPH01205A   |
| B10      | Hs.37026  | NM_024013    | IFNA1    | Interferon, alpha 1                                      | IFL/IFN/IFN-ALPHA/IFN  | PPH01321B   |
| B11      | Hs.93177  | NM_002176    | IFNB1    | Interferon, beta 1, fibroblast                           | IFB/IFF/IFNB/MGC969    | PPH00384F   |
| B12      | Hs.856    | NM_000619    | IFNG     | Interferon, gamma                                        | IFG/IFI                | PPH00380C   |
| C01      | Hs.597664 | NM_001556    | IKBKB    | Inhibitor of kappa light polypeptide gene enhancer       | FLJ33771/FLJ36218/FLJ  | PPH00780C   |
| C02      | Hs.193717 | NM_000572    | IL10     | Interleukin 10                                           | CSIF/IL-10/IL10A/MGC   | PPH00572C   |
| C03      | Hs.673    | NM_000882    | IL12A    | Interleukin 12A (natural killer cell stimulatory factor) | CLMF/IL-12A/NFSK/NK    | PPH00544B   |
| C04      | Hs.1722   | NM_000575    | IL1A     | Interleukin 1, alpha                                     | IL-1A/IL1/IL1-ALPHA/IL | PPH00690A   |
| C05      | Hs.126256 | NM_000576    | IL1B     | Interleukin 1, beta                                      | IL-1/IL1-BETA/IL1F2    | PPH00171C   |
| C06      | Hs.89679  | NM_000586    | IL2      | Interleukin 2                                            | IL-2/TCGF/lymphokine   | PPH00172C   |
| C07      | Hs.654458 | NM_000600    | IL6      | Interleukin 6 (interferon, beta 2)                       | BSF2/HGF/HSF/IFNB2/I   | PPH00560C   |
| C08      | Hs.624    | NM_000584    | IL8      | Interleukin 8                                            | CXCL8/GCP-1/GCP1/LE    | PPH00568A   |
| C09      | Hs.522819 | NM_001569    | IRAK1    | Interleukin-1 receptor-associated kinase 1               | IRAK/pelle             | PPH00835A   |
| C10      | Hs.449207 | NM_001570    | IRAK2    | Interleukin-1 receptor-associated kinase 2               | IRAK-2/MGC150550       | PPH01800C   |
| C11      | Hs.138499 | NM_016123    | IRAK4    | Interleukin-1 receptor-associated kinase 4               | IPD1/NY-REN-64/RENG    | PPH06036A   |
| C12      | Hs.436061 | NM_002198    | IRF1     | Interferon regulatory factor 1                           | IRF-1/MAR              | PPH00320F   |
| D01      | Hs.75254  | NM_001571    | IRF3     | Interferon regulatory factor 3                           | -                      | PPH02025B   |
| D02      | Hs.714791 | NM_002228    | JUN      | Jun proto-oncogene                                       | AP-1/AP1/c-Jun         | PPH00095A   |
| D03      | Hs.36     | NM_000595    | LTA      | Lymphotoxin alpha (TNF superfamily, member 1)            | LT/TNFB/TNFSF1         | PPH00337F   |
| D04      | Hs.653138 | NM_004271    | LY86     | Lymphocyte antigen 86                                    | MD-1/MMD-1/dJ80N2      | PPH06038F   |
| D05      | Hs.660766 | NM_015364    | LY96     | Lymphocyte antigen 96                                    | ESOP-1/MD-2/MD2/ly     | PPH06052A   |
| D06      | Hs.514012 | NM_002756    | MAP2K3   | Mitogen-activated protein kinase kinase 3                | MAPKK3/MEK3/MKK3       | PPH00747F   |
| D07      | Hs.514681 | NM_003010    | MAP2K4   | Mitogen-activated protein kinase kinase 4                | JNKK/JNKK1/MAPKK4/I    | PPH00195C   |
| D08      | Hs.657756 | NM_005921    | MAP3K1   | Mitogen-activated protein kinase kinase kinase 1         | MAPKKK1/MEKK/MEKK      | PPH00706C   |
| D09      | Hs.644143 | NM_003188    | MAP3K7   | Mitogen-activated protein kinase kinase kinase 7         | MEKK7/TAK1/TGF1a       | PPH00749C   |
| D10      | Hs.431550 | NM_004834    | MAP4K4   | Mitogen-activated protein kinase kinase kinase kinase    | FLH21957/FLJ10410/FL   | PPH06047A   |
| D11      | Hs.138211 | NM_002750    | MAPK8    | Mitogen-activated protein kinase 8                       | JNK/JNK1/JNK1A2/JNK    | PPH00720B   |
| D12      | Hs.207763 | NM_015133    | MAPK8IP3 | Mitogen-activated protein kinase 8 interacting protein   | DKFZp762N1113/FLJ0     | PPH006051A  |
| E01      | Hs.82116  | NM_002468    | MYD88    | Myeloid differentiation primary response gene (88)       | MYD88D                 | PPH00911B   |
| E02      | Hs.654408 | NM_003998    | NFKB1    | Nuclear factor of kappa light polypeptide gene enhancer  | DKFZp686C01211/EBP     | PPH00204F   |
| E03      | Hs.73090  | NM_002502    | NFKB2    | Nuclear factor of kappa light polypeptide gene enhancer  | LYT-10/LYT10/p52       | PPH00782F   |
| E04      | Hs.81328  | NM_020529    | NFKBIA   | Nuclear factor of kappa light polypeptide gene enhancer  | IKBA/MAD-3/NFKBI       | PPH00170F   |
| E05      | Hs.2764   | NM_005007    | NFKBIL1  | Nuclear factor of kappa light polypeptide gene enhancer  | IKBL/LST1/NFKBIL       | PPH01802A   |
| E06      | Hs.530539 | NM_006165    | NFRKB    | Nuclear factor related to kappaB binding protein         | DKFZp547B2013/INO8     | PPH01997B   |
| E07      | Hs.591667 | NM_003298    | NR2C2    | Nuclear receptor subfamily 2, group C, member 2          | TAK1/TR2R1/TR4/hTAK    | PPH01268F   |
| E08      | Hs.7886   | NM_020651    | PEL1     | Pellino homolog 1 (Drosophila)                           | DKFZp686C18116/MGC     | PPH06053A   |
| E09      | Hs.103110 | NM_005036    | PPARA    | Peroxisome proliferator-activated receptor alpha         | MGC2237/MGC2452/N      | PPH01281B   |
| E10      | Hs.570274 | NM_003690    | PRKRA    | Protein kinase, interferon-inducible double stranded     | DYT16/PACT/RAX         | PPH02171E   |
| E11      | Hs.196384 | NM_000963    | PTGS2    | Prostaglandin-endoperoxide synthase 2 (prostaglandin     | COX-2/COX2/GRIPGHS     | PPH01136F   |
| E12      | Hs.631886 | NM_002908    | REL      | V-rel reticuloendotheliosis viral oncogene homolog       | C-Rel                  | PPH00101B   |
| F01      | Hs.502875 | NM_021975    | RELA     | V-rel reticuloendotheliosis viral oncogene homolog       | MGC131774/NFKB3/pg     | PPH01812B   |
| F02      | Hs.103755 | NM_003821    | RIPK2    | Receptor-interacting serine-threonine kinase 2           | CARD3/CARDIAK/CKK4     | PPH00881C   |
| F03      | Hs.532781 | NM_015077    | SARM1    | Sterile alpha and TIR motif containing 1                 | FLJ36296/KIAA0524/SA   | PPH06037A   |
| F04      | Hs.501624 | NM_021805    | SIGIRR   | Single immunoglobulin and toll-interleukin 1 receptor    | MGC110992/TIR8         | PPH06049A   |
| F05      | Hs.507681 | NM_006116    | TAB1     | TGF-beta activated kinase 1/MAP3K7 binding protein       | 3'-Tab1/MAP3K7IP1/M    | PPH01804B   |
| F06      | Hs.505874 | NM_013254    | TBK1     | TANK-binding kinase 1                                    | FLJ11330/NAK/T2K       | PPH01797E   |
| F07      | Hs.29344  | NM_182919    | TICAM1   | Toll-like receptor adaptor molecule 1                    | MGC35334/PRVTIRB/TI    | PPH06044A   |
| F08      | Hs.710895 | NM_021649    | TICAM2   | Toll-like receptor adaptor molecule 2                    | MGC129876/MGC1298      | PPH06042A   |
| F09      | Hs.537126 | NM_001039661 | TIRAP    | Toll-interleukin 1 receptor (TIR) domain containing      | FLJ42305/Mal/wyatt     | PPH06246B   |
| F10      | Hs.654532 | NM_003263    | TLR1     | Toll-like receptor 1                                     | CD281/DFZp54710610     | PPH01799A   |
| F11      | Hs.120551 | NM_030956    | TLR10    | Toll-like receptor 10                                    | CD290/MGC104967/M      | PPH01794B   |
| F12      | Hs.519033 | NM_003264    | TLR2     | Toll-like receptor 2                                     | CD282/TL4              | PPH01808A   |
| G01      | Hs.657724 | NM_003265    | TLR3     | Toll-like receptor 3                                     | CD283                  | PPH01803E   |
| G02      | Hs.174312 | NM_138554    | TLR4     | Toll-like receptor 4                                     | ARMD10/CD284/TOLL      | PPH01795F   |
| G03      | Hs.604542 | NM_003268    | TLR5     | Toll-like receptor 5                                     | FLJ10052/MGC126430     | PPH01793F   |
| G04      | Hs.662185 | NM_006068    | TLR6     | Toll-like receptor 6                                     | CD286                  | PPH01798E   |
| G05      | Hs.659215 | NM_016562    | TLR7     | Toll-like receptor 7                                     | -                      | PPH01796A   |
| G06      | Hs.660543 | NM_138636    | TLR8     | Toll-like receptor 8                                     | CD288/MGC119599/M      | PPH01801B   |
| G07      | Hs.87968  | NM_017442    | TLR9     | Toll-like receptor 9                                     | CD289                  | PPH01809A   |
| G08      | Hs.241570 | NM_000594    | TNF      | Tumor necrosis factor                                    | DIF/TNF-alpha/TNFA/T   | PPH00341F   |
| G09      | Hs.279594 | NM_001065    | TNFRSF1A | Tumor necrosis factor receptor superfamily, member       | CD120a/PPF/MGC1958     | PPH00346C   |
| G10      | Hs.368527 | NM_019009    | TOLLIP   | Toll interacting protein                                 | FLJ33531/IL-1RAcP      | PPH05844C   |
| G11      | Hs.591983 | NM_004620    | TRAF6    | TNF receptor-associated factor 6                         | MGC:3310/RNF85         | PPH00329B   |
| G12      | Hs.524630 | NM_003348    | UBE2N    | Ubiquitin-conjugating enzyme E2N                         | MGC131857/MGC8489      | PPH02724A   |

**HPV-transformed cells exhibit altered HMGB1-TLR4/MyD88-SARM1 signaling**  
 Mirian Galliotte Morale, Walason da Silva Abjaude, Aline Montenegro Silva, Luisa Lina  
 Supplementary Table 1

| Symbol   | Relative to control group PHK |          |                 |          |                 |          |
|----------|-------------------------------|----------|-----------------|----------|-----------------|----------|
|          | C33A                          |          | HeLa            |          | SiHa            |          |
|          | Fold Regulation               | pValue   | Fold Regulation | pValue   | Fold Regulation | pValue   |
| BTK      | -2.0127                       | 0,26774  | -2.682          | 0,31192  | -1,9767         | 0,26601  |
| CASP8    | -83.2378                      | 0,000119 | -1.879          | 0,004909 | -1,293          | 0,28434  |
| CCL2     | -8.1257                       | 0,08706  | 16.374          | 0,000419 | -4.016          | 0,12958  |
| CD14     | -2.5713                       | 0,21728  | 1,1975          | 0,78418  | 167.6511        | 0,05265  |
| CD180    | 1,2694                        | 0,1531   | 6.4086          | 0,045922 | -1,2941         | 0,39898  |
| CD80     | 1,2991                        | 0,86404  | -5.2416         | 0,23214  | -2.6905         | 0,26373  |
| CD86     | -34.2769                      | 0,24308  | -550.0174       | 0,23724  | -293.0857       | 0,23762  |
| CHUK     | 1,7023                        | 0,036454 | -1.674          | 0,36163  | -1,2886         | 0,482    |
| CLEC4E   | 2.7085                        | 0,045802 | -5.9244         | 0,07711  | -3.1569         | 0,1215   |
| CSF2     | -13.3846                      | 0,15123  | -28.3118        | 0,14384  | -16.8316        | 0,14754  |
| CSF3     | -530.975                      | 0,24474  | -3911.0312      | 0,24439  | -223.4831       | 0,24573  |
| CXCL10   | -49.3793                      | 0,27322  | -348.8992       | 0,27076  | -32.4396        | 0,27476  |
| ECSIT    | 1,4582                        | 0,65998  | 1,5122          | 0,58316  | 1,5687          | 0,53848  |
| EIF2AK2  | 1,0335                        | 0,91389  | -7.8354         | 0,029994 | -1,9179         | 0,15595  |
| ELK1     | 1,1388                        | 0,88879  | 2.9214          | 0,11508  | 6.6822          | 0,05454  |
| FADD     | -2.3174                       | 0,33356  | 3.1239          | 0,24655  | 3.3971          | 0,17962  |
| FOS      | -12.5461                      | 0,20713  | -42.7149        | 0,19298  | -3.8755         | 0,26085  |
| HMGB1    | 5.5053                        | 0,003132 | -3.302          | 0,035422 | -1,1123         | 0,55468  |
| HRAS     | -1.6731                       | 0,40946  | 1               | 0,61422  | 2.0233          | 0,7379   |
| HSPA1A   | 1,4381                        | 0,4007   | 6.1333          | 0,07625  | 13.0453         | 0,06569  |
| HSPD1    | 2.8366                        | 0,001375 | 2.969           | 0,038492 | 1,7514          | 0,01244  |
| IFNA1    | -8.3349                       | 0,017002 | -2.4509         | 0,06449  | -9.9106         | 0,016054 |
| IFNB1    | 1,0169                        | 0,78102  | -11.4188        | 0,09667  | -2.1063         | 0,23465  |
| IFNG     | 1,3112                        | 0,86011  | -7.6919         | 0,23894  | -6.6277         | 0,23178  |
| IKBKB    | 1,4348                        | 0,041726 | -2.6512         | 0,005166 | -1,7616         | 0,11814  |
| IL10     | 1,1102                        | 0,91086  | -4.7131         | 0,17081  | -2.1978         | 0,25463  |
| IL12A    | 3.7257                        | 0,00008  | -5.2054         | 0,001139 | -2.6503         | 0,001863 |
| IL1A     | -2725.868                     | 0,002619 | -820.2956       | 0,002627 | -478.054        | 0,002635 |
| IL1B     | -2584.7935                    | 0,005522 | -2407.5221      | 0,005522 | -187.3754       | 0,005618 |
| IL2      | 1,9919                        | 0,06059  | -4.122          | 0,10419  | -3.479          | 0,05668  |
| IL6      | -22.9831                      | 0,08949  | 2.8284          | 0,05171  | 20.5483         | 0,11835  |
| IL8      | -35.0781                      | 0,043832 | -9.4698         | 0,05516  | -2.6102         | 0,20035  |
| IRAK1    | -1,2079                       | 0,51816  | 1,923           | 0,40738  | -1,2899         | 0,767    |
| IRAK2    | -16.1392                      | 0,20829  | -4.801          | 0,24909  | -2.5066         | 0,31885  |
| IRAK4    | 4.0395                        | 0,000162 | -5.8971         | 0,009925 | -2.9904         | 0,046068 |
| IRF1     | -1,8308                       | 0,31468  | -2.3674         | 0,24899  | 1,7976          | 0,42603  |
| IRF3     | 2.804                         | 0,000191 | -4.2871         | 0,004676 | 1,0351          | 0,87973  |
| JUN      | -10.6233                      | 0,32423  | 1,4044          | 0,60064  | 1,1673          | 0,55342  |
| LTA      | -1,2447                       | 0,27194  | 1,1225          | 0,67922  | 1,6716          | 0,72184  |
| LY86     | -1,1183                       | 0,53499  | -4.4485         | 0,23516  | -1,8697         | 0,30594  |
| LY96     | -18.885                       | 0,038116 | -739.2917       | 0,032008 | -99.8918        | 0,032759 |
| MAP2K3   | 2.3201                        | 0,11971  | -4.3873         | 0,11201  | -2.2902         | 0,17686  |
| MAP2K4   | 2.1798                        | 0,000969 | -3.4742         | 0,006684 | -1,3254         | 0,32402  |
| MAP3K1   | -1.3972                       | 0,014551 | -2.8219         | 0,000499 | -1,1017         | 0,62034  |
| MAP3K7   | 1,8245                        | 0,001959 | -3.1821         | 0,004372 | -2.1965         | 0,005102 |
| MAP4K4   | -1,7441                       | 0,033613 | -4.9019         | 0,005128 | -2.7319         | 0,009046 |
| MAPK8    | 3.1913                        | 0,002086 | -4.1602         | 0,001779 | -1,4706         | 0,11744  |
| MAPK8IP1 | -1,1968                       | 0,60634  | -1,0234         | 0,67173  | 2.8174          | 0,25313  |
| MYD88    | -28.2955                      | 0,036589 | -7.1437         | 0,05029  | -3.2794         | 0,07961  |
| NFKB1    | -1,5755                       | 0,38623  | -2.4509         | 0,25439  | 1,4911          | 0,74307  |
| NFKB2    | -1,1534                       | 0,57019  | -3.1675         | 0,1334   | 1,1676          | 0,95298  |
| NFKBIA   | -4.2945                       | 0,05407  | -3.8459         | 0,06086  | 1,7088          | 0,19092  |
| NFKBIL1  | -1,1375                       | 0,25913  | 314.4456        | 0,37317  | 11.3665         | 0,37922  |
| NFRKB    | 2.8366                        | 0,000473 | -2.1435         | 0,014417 | 1,0564          | 0,74442  |
| NR2C2    | 1,1154                        | 0,59389  | -1,2058         | 0,23761  | -1,1187         | 0,67809  |
| PELI1    | -2.9673                       | 0,013267 | -10.9536        | 0,003752 | -6.1177         | 0,00509  |
| PPARA    | -1,2276                       | 0,42583  | -2.0801         | 0,11031  | -1,1911         | 0,5647   |
| PRKRA    | 1,8457                        | 0,000619 | -2.3729         | 0,017085 | -1,4253         | 0,05395  |
| PTGS2    | -1356.6504                    | 0,000401 | -174.047        | 0,00041  | -19.0958        | 0,000579 |
| REL      | 1,0625                        | 0,69082  | -4.2871         | 0,000901 | -2.9885         | 0,001503 |
| RELA     | 1,3325                        | 0,19038  | -1,4607         | 0,13816  | -1,0122         | 0,99174  |
| RIPK2    | 2.441                         | 0,00028  | -5.439          | 0,002107 | -2.5779         | 0,004401 |
| SARM1    | 18.2628                       | 0,000167 | 6.9483          | 0,003589 | 116.056         | 0,021559 |
| SIGIRR   | -4.4976                       | 0,12346  | -4.7131         | 0,15228  | -2.9575         | 0,15776  |
| TAB1     | 1,3763                        | 0,74159  | 1,0994          | 0,9056   | 1,7426          | 0,417    |
| TBK1     | 5.1844                        | 0,012517 | -2.2038         | 0,10235  | 1,1418          | 0,77775  |
| TICAM1   | -1,7603                       | 0,027445 | -5.0397         | 0,001533 | -5.6368         | 0,001282 |
| TICAM2   | -1,9086                       | 0,07942  | -3.4105         | 0,032758 | -2.0449         | 0,07373  |
| TIRAP    | 1,3605                        | 0,98724  | -1,2002         | 0,52488  | 2.4155          | 0,343    |
| TLR1     | -1,9988                       | 0,15861  | -1,1329         | 0,65095  | -16.3299        | 0,043127 |
| TLR10    | 2.413                         | 0,06974  | -8.6939         | 0,002249 | -4.741          | 0,004898 |
| TLR2     | -77.1271                      | 0,006191 | -560.2784       | 0,005957 | -55.5681        | 0,006316 |
| TLR3     | -2.1079                       | 0,025469 | -12.4092        | 0,001999 | -4.4118         | 0,00518  |
| TLR4     | -1,4871                       | 0,26921  | 38.4968         | 0,000309 | 8.8637          | 0,038814 |
| TLR5     | -3.1077                       | 0,045124 | -27.5376        | 0,011405 | -11.9529        | 0,012987 |
| TLR6     | -7.8671                       | 0,05446  | 1.8575          | 0,1841   | -6.0691         | 0,06002  |
| TLR7     | 1,6142                        | 0,76684  | -5.5404         | 0,23666  | -2.1057         | 0,32275  |
| TLR8     | 2.7085                        | 0,045802 | -5.9244         | 0,07711  | -1,6863         | 0,28469  |
| TLR9     | -1,0564                       | 0,66105  | -5.3025         | 0,046891 | -2.9767         | 0,08963  |
| TNF      | -30.1169                      | 0,11309  | -103.9683       | 0,10839  | -257.5149       | 0,10721  |
| TNFRSF1  | -78.7477                      | 0,25122  | 2.4794          | 0,64225  | 4.24            | 0,18183  |
| TOLLIP   | -2.2436                       | 0,33594  | -4.1125         | 0,26481  | 1,3934          | 0,99369  |
| TRAF6    | 1,1817                        | 0,72474  | -6.0071         | 0,028971 | -3.0218         | 0,05203  |
| UBE2N    | 2.8962                        | 0,001254 | -3.2117         | 0,022873 | -1,8502         | 0,06162  |

## HPV-transformed cells exhibit altered HMGB1-TL

Mirian Gallote Morales, Walason da Silva Abjaude, Aline Mor  
Supplementary Table II

| Symbol   | Relative to control group C33A |          |                 |          |
|----------|--------------------------------|----------|-----------------|----------|
|          | HeLa                           |          | SiHa            |          |
|          | Fold Regulation                | pvalue   | Fold Regulation | pvalue   |
| BTK      | -1,3325                        | 0,82536  | 1,0182          | 0,97566  |
| CASP8    | 44,2979                        | 0,000459 | 64,3754         | 0,006568 |
| CCL2     | 133,0508                       | 0,00023  | 2,0234          | 0,25882  |
| CD14     | 3,0791                         | 0,02003  | 431,0819        | 0,05185  |
| CD180    | 5,0484                         | 0,05275  | -1,6428         | 0,10497  |
| CD80     | -6,8093                        | 0,08955  | -3,4952         | 0,09671  |
| CD86     | -16,0463                       | 0,000782 | -8,5505         | 0,001185 |
| CHUK     | -2,8497                        | 0,020659 | -2,1936         | 0,012108 |
| CLEC4E   | -16,0463                       | 0,000782 | -8,5505         | 0,001185 |
| CSF2     | -2,1153                        | 0,17055  | -1,2575         | 0,04947  |
| CSF3     | -7,3658                        | 0,000752 | 2,3759          | 0,29205  |
| CXCL10   | -7,0657                        | 0,007418 | 1,5222          | 0,016674 |
| ECSIT    | 1,0371                         | 0,76381  | 1,0758          | 0,49947  |
| EIF2AK2  | -8,0976                        | 0,00013  | -1,9821         | 0,015062 |
| ELK1     | 2,5654                         | 0,01603  | 5,8678          | 0,04476  |
| FADD     | 7,2392                         | 0,014137 | 7,8725          | 0,005284 |
| FOS      | -3,4046                        | 0,014472 | 3,2373          | 0,020271 |
| HMGB1    | -18,1786                       | 0,001462 | -6,1237         | 0,002273 |
| HRAS     | 1,6731                         | 0,045665 | 3,3851          | 0,000884 |
| HSPA1A   | 4,2649                         | 0,08935  | 9,0712          | 0,07057  |
| HSPD1    | 1,0467                         | 0,73592  | -1,6196         | 0,005993 |
| IFNA1    | 3,4007                         | 0,016535 | -1,189          | 0,29627  |
| IFNB1    | -11,6116                       | 0,000872 | -2,1419         | 0,006189 |
| IFNG     | -10,0852                       | 0,003523 | -8,6899         | 0,001893 |
| IKBKB    | -3,804                         | 0,000288 | -2,5275         | 0,012053 |
| IL10     | -5,2325                        | 0,014727 | -2,4401         | 0,024059 |
| IL12A    | -19,3935                       | 0,000024 | -9,8741         | 0,000025 |
| IL1A     | 3,323                          | 0,019347 | 5,702           | 0,000396 |
| IL1B     | 1,0736                         | 0,87351  | 13,7947         | 0,000428 |
| IL2      | -8,2107                        | 0,004273 | -6,9299         | 0,001227 |
| IL6      | 65,006                         | 0,00132  | 472,2626        | 0,10734  |
| IL8      | 3,7042                         | 0,14185  | 13,4387         | 0,12697  |
| IRAK1    | 2,3227                         | 0,1142   | -1,0679         | 0,74533  |
| IRAK2    | 3,3616                         | 0,011928 | 6,4388          | 0,015567 |
| IRAK4    | -23,8211                       | 0,000005 | -12,0795        | 0,000032 |
| IRF1     | -1,2931                        | 0,06958  | 3,2911          | 0,028877 |
| IRF3     | -12,0211                       | 0,000002 | -2,7089         | 0,000032 |
| JUN      | 14,9199                        | 0,000123 | 12,4003         | 0,011237 |
| LTA      | 1,3972                         | 0,44677  | 2,0807          | 0,10251  |
| LY86     | -3,7603                        | 0,10947  | -1,5804         | 0,07227  |
| LY96     | -39,1471                       | 0,05333  | -5,2895         | 0,08006  |
| MAP2K3   | -10,1788                       | 0,002001 | -5,3134         | 0,002747 |
| MAP2K4   | -7,5728                        | 0,000007 | -2,889          | 0,001077 |
| MAP3K1   | -2,0197                        | 0,001634 | 1,2682          | 0,20896  |
| MAP3K7   | -5,8058                        | 0,000113 | -4,0074         | 0,000059 |
| MAP4K4   | -2,8105                        | 0,003071 | -1,5663         | 0,003631 |
| MAPK8    | -13,2768                       | 0,000535 | -4,6931         | 0,001351 |
| MAPK8IP1 | 1,1695                         | 0,74705  | 3,3718          | 0,14613  |
| MYD88    | 3,9609                         | 0,024791 | 8,6284          | 0,000081 |
| NFKB1    | -1,5556                        | 0,021443 | 2,3493          | 0,011567 |
| NFKB2    | -2,7463                        | 0,007176 | 1,3466          | 0,12899  |
| NFKBIA   | 1,1166                         | 0,45065  | 7,3385          | 0,004164 |
| NFKBIL1  | 357,6736                       | 0,37311  | 12,9291         | 0,36726  |
| NFRKB    | -6,0804                        | 0,000128 | -2,6852         | 0,002499 |
| NR2C2    | -1,3449                        | 0,1824   | -1,2477         | 0,42706  |
| PELI1    | -3,6914                        | 0,007023 | -2,0617         | 0,024413 |
| PPARA    | -1,6945                        | 0,036971 | 1,0306          | 0,79836  |
| PRKRA    | -4,3797                        | 0,000305 | -2,6307         | 0,000134 |
| PTGS2    | 7,7947                         | 0,019438 | 71,0444         | 0,06862  |
| REL      | -4,5552                        | 0,006134 | -3,1753         | 0,00952  |
| RELA     | -1,9464                        | 0,001783 | -1,3488         | 0,23024  |
| RIPK2    | -13,2768                       | 0,000007 | -6,2927         | 0,000005 |
| SARM1    | -2,6284                        | 0,000573 | 6,3548          | 0,034308 |
| SIGIRR   | -1,0479                        | 0,74389  | 1,5207          | 0,29629  |
| TAB1     | -1,2519                        | 0,22371  | 1,2661          | 0,42173  |
| TBK1     | -11,4254                       | 0,007294 | -4,5406         | 0,012039 |
| TICAM1   | -2,8629                        | 0,008868 | -3,2022         | 0,006375 |
| TICAM2   | -1,787                         | 0,025878 | -1,0714         | 0,63927  |
| TIRAP    | -1,633                         | 0,002691 | 1,7754          | 0,27499  |
| TLR1     | 1,7644                         | 0,1509   | -8,1697         | 0,000542 |
| TLR10    | -20,9784                       | 0,016579 | -11,44          | 0,019495 |
| TLR2     | -7,2643                        | 0,004585 | 1,388           | 0,24966  |
| TLR3     | -5,8869                        | 0,006384 | -2,0929         | 0,05571  |
| TLR4     | 57,2485                        | 0,000185 | 13,1812         | 0,010956 |
| TLR5     | -8,8612                        | 0,029067 | -3,8462         | 0,042195 |
| TLR6     | 14,6129                        | 0,004008 | 1,2963          | 0,29057  |
| TLR7     | -8,9435                        | 0,006584 | -3,3991         | 0,007503 |
| TLR8     | -16,0463                       | 0,000782 | -4,5672         | 0,003118 |
| TLR9     | -5,0193                        | 0,003938 | -2,8177         | 0,019519 |
| TNF      | -3,4522                        | 0,004907 | -8,5505         | 0,001185 |
| TNFRSF1  | 195,2484                       | 0,002258 | 333,888         | 0,006062 |
| TOLLIP   | -1,8329                        | 0,002747 | 3,1262          | 0,09317  |
| TRAF6    | -7,0984                        | 0,000037 | -3,5707         | 0,000087 |
| UBE2N    | -9,3017                        | 0,000061 | -5,3587         | 0,000068 |
